# Supplementary material for: Black perithecial pigmentation in Fusarium species is due to the accumulation of 5-deoxybostrycoidin-based melanin
Source: PubMed Central journal article supplement (PMC4872168; doi:10.1038/srep26206), 2016-05-19
Supplement: srep26206-s1.pdf [file srep26206-s1.pdf]

**SUPPLEMENTARY INFORMATION for the article**  
**“Black perithecial pigmentation in *Fusarium* species is due to the**  
**accumulation of 5-deoxybostrycoidin-based melanin”**

**Rasmus J.N. Frandsen\*, Silas A. Rasmussen, Peter B. Knudsen, Silvio Uhlig, Dirk Petersen, Erik Lysøe, Charlotte H. Gotfredsen, Henriette Giese & Thomas O. Larsen**

**Contents**

|                                                                                          |    |
|------------------------------------------------------------------------------------------|----|
| Prediction of the catalytic potential of the PGL1 gene cluster .....                     | 2  |
| Primers used for genetic modifications and validation .....                              | 3  |
| Genetic modification strategy .....                                                      | 5  |
| Validation of genetically modified strains by PCR and Southern blot analysis .....       | 7  |
| Evolutionary models for the development of pigment biosynthesis in <i>Fusarium</i> ..... | 15 |
| UV/VIS and MS data for compound (1) to (5) .....                                         | 16 |
| NMR data for compound (3) and (5) .....                                                  | 17 |
| Possible configuration of purpurfusarin (5) .....                                        | 19 |
| Selected HMBC and NOE correlation for purpurfusarin (5) .....                            | 19 |
| Purification scheme for compound (3), (4) and (5) .....                                  | 21 |

## Prediction of the catalytic potential of the PGL1 gene cluster

**Table S1** Prediction of the catalytic potential of the PGL1 gene cluster. Predictions based on the identified Pfam & CDD motifs, combined with the most similar characterized enzymes.

| Name | Accession no | Identified structural domains                                                                                                                    | Predicted catalytic potential or function    |
|------|--------------|--------------------------------------------------------------------------------------------------------------------------------------------------|----------------------------------------------|
| PGL1 | FGSG_17168   | SAT (aa 1 - aa 369)<br>KS (cd00833)<br>AT (pfam00698)<br>PT (aa 1227 - aa 1576)<br>ACP (pfam00550)<br>ACP (pfam00550)<br>Dehydrogenase (COG3320) | Polyketide synthase                          |
| PglJ | FGSG_15669   | O-methyltransferase (pfam00891)                                                                                                                  | O-methyltransferase (EC2.1.1.110)            |
| PglM | FGSG_09184   | FAD-binding monooxygenase (pfam01494)                                                                                                            | Monooxygenase (EC 1.14.13.8)                 |
| PglL | FGSG_09185   |                                                                                                                                                  | Adenylosuccinate lyase (EC 4.3.2.2)          |
| PglX | FGSG_17170   | Zinc-binding dehydrogenase (pfam00107)                                                                                                           | Dehydrogenase/quinone reductase (EC 1.6.5.5) |
| PglV | FGSG_09187   | Short chain dehydrogenase (COG1028)                                                                                                              | Short-chain dehydrogenase (EC 1.1.1.100)     |
| PglR | FGSG_17171   | Zn(II) <sub>2</sub> Cys <sub>2</sub> transcription factor (cl00068)                                                                              | Fungal transcription factor                  |
| PglE | FGSG_09189   | Alpha/beta hydrolase family (pfam12697)<br>Esterase (cd12809)                                                                                    | Esterase                                     |

## Primers used for genetic modifications and validation

**Table S2** Primers used in the study. In application: S/V = Screening and validation

| Gene     | Sequence                                        | gDNA    | Application                   |
|----------|-------------------------------------------------|---------|-------------------------------|
| PGL1-A1  | 5' - TCGGTACCAAGGCCCTAGGAGGTCAGCCTTTGTGATGCCACC | 1895 bp | Replacement of <i>PGL1</i>    |
| PGL1-A2  | 5' - GGCCGTGGCCAGCCCTGGACACCTGTCAACGACATCGCTGAT |         |                               |
| PGL1-A3  | 5' - CGTTTAAACGGATTTTCATTGCAAACTCTTCAACGCCCTCA  |         |                               |
| PGL1-A4  | 5' - GACATTAATTAATTTGCGCCAAGCAAATGCTCGACATTAGAG | 1839 bp | Replacement of <i>PGL1</i>    |
| PGL1-T3  | 5' - TCCTTTTCGCAGCGGGCTTGATAA                   | 2327 bp | S/V                           |
| PGL1-T4  | 5' - CGGCCCTTGATCTCCTCTGGTAGGTCT                | 2237 p  | S/V                           |
| PGL1-O1  | 5' - GACATTAATTAATTTTCGAGGTGGGATAAAAACTTACATC   | 1294 bp | Overexpression of <i>PGL1</i> |
| PGL1-O2  | 5' - CGTTTAAACGGATTTAACAAAGGTGTTGAATCTGTAAAG    |         |                               |
| PGL1-O3  | 5' - GAGCAGACATCACCCATGGCTTCCCATATTAAGCTGTATCTC | 1222 bp | Overexpression of <i>PGL1</i> |
| PGL1-O4  | 5' - TCGGTACCAAGGCCCAACGATAGCAAGCTTTGGCTTGGCGG  |         |                               |
| PGL1-OT1 | 5' - ACTGAACGCATGCCACGACAACCTCATC               | 2044 bp | S/V                           |
| PGL1-OT2 | 5' - CGAAGACTTGGGACTGGCTTGTGAACA                | 1569 bp | S/V                           |
| PGLJ-U1  | 5' - GGTTTAAUAGCTTGGCTGAGCTGTGTTAGTGA           | 1001 bp | Replacement of <i>PGLJ</i>    |
| PGLJ-U2  | 5' - GGACTTAAUCATCTTGGGTTAGTTATGTTGTATGCA       |         |                               |
| PGLJ-U3  | 5' - GGACTTAAUTAGATTGGGGTAGATTGGGGTAGATTTG      |         |                               |
| PGLJ-U4  | 5' - GGTTTAAUACTGGCAGCTCAAGTTCAGAGATCC          | 1003 bp | Replacement of <i>PGLJ</i>    |
| PGLJ-T1  | 5' - CCATCTTTACGATCAAGCCGC                      | 579 bp  | S/V                           |
| PGLJ-T2  | 5' - GGGAGGTCTTCAATCACGAAGTTG                   |         |                               |
| PGLJ-T3  | 5' - TGCCAGCCAAGTATTGTGCAAG                     | 1573 bp | S/V                           |
| PGLJ-T4  | 5' - AGAACAACGCAGTGCACCCAGC                     | 1208 bp | S/V                           |
| PGLM-U1  | 5' - GGTTTAAUTCATGTTAGCCACAGCATTTCTCAATC        | 1000 bp | Replacement of <i>PGLM</i>    |
| PGLM-U2  | 5' - GGACTTAAUTAAGCGAGTTTAGGGAGTGTAGGG          |         |                               |
| PGLM-U3  | 5' - GGACTTAAUCATATCTTGGGCATGCGTTTTCTC          |         |                               |
| PGLM-U4  | 5' - GGTTTAAUGCGGTTTATTATGTGCAGAATCTCAA         | 1009 bp | Replacement of <i>PGLM</i>    |
| PGLM-T1  | 5' - TTGCGAGAGTGACGCCGCTTCTCAAT                 | 520 bp  | S/V                           |
| PGLM-T2  | 5' - GCGTTGAAGGACCCCTTTGGTCA                    |         |                               |
| PGLM-T3  | 5' - TATCATGGCTGCCGTGAAAACC                     | 1474 bp | S/V                           |
| PGLM-T4  | 5' - GCTGCTGAGTTGAATGTTTAAAGAGC                 | 1281 bp | S/V                           |
| PGLX-U1  | 5' - GGTTTAAUAATCTCAAGGAACTGGCCT                | 1000 bp | Replacement of <i>PGLX</i>    |
| PGLX-U2  | 5' - GGACTTAAUTGATTGAAATACTTTTCAATAATAT         |         |                               |
| PGLX-U3  | 5' - GGACTTAAUAGAGCTGTTCTGTTTCGACAGACGATAA      |         |                               |
| PGLX-U4  | 5' - GGTTTAAUTGAGGCTTCTTCATTACCCGTCCG           | 1039 bp | Replacement of <i>PGLX</i>    |
| PGLX-T1  | 5' - GCTGAAGTATCTGGTAAAAACATATCCAAAG            | 553 bp  | S/V                           |
| PGLX-T2  | 5' - AACATGGCTGACGATGATCACA                     |         |                               |
| PGLX-T3  | 5' - GTAACACTGGTACCAAACCAGTAACAGCGTTG           | 1300 bp | S/V                           |
| PGLX-T4  | 5' - TAGCTCCTGTTTCGCGTCAACGC                    | 1056 bp | S/V                           |
| PGLV-U1  | 5' - GGTTTAAUTCATACACTCCTTCGCCAACCTCA           | 1000 bp | Replacement of <i>PGLV</i>    |
| PGLV-U2  | 5' - GGACTTAAUTAGAACGGAGAGACTGGTCTCCGA          |         |                               |
| PGLV-U3  | 5' - GGACTTAAUCATTTTGTATGATTTGAAGTTTCAATTG      |         |                               |
| PGLV-U4  | 5' - GGTTTAAUCGCAATTATCTTGACATACAATATTGGC       | 1028 bp | Replacement of <i>PGLV</i>    |
| PGLV-T1  | 5' - ACATCCTCCACCTGGCCAATCG                     | 500 bp  | S/V                           |
| PGLV-T2  | 5' - ATCCCTTGCAACCTCGGCTCCT                     |         |                               |
| PGLV-T3  | 5' - CAGAGTCTGGGACTGGAAGCCA                     | 1416 bp | S/V                           |
| PGLV-T4  | 5' - GCGGTGAGGAATATGACGGAAG                     | 1354 bp | S/V                           |
| PGLR-E1  | 5' - GGACTTAAUGTCTGACGGCTATCGAATTTTCGA          | 2196 bp | Overexpression of <i>PGLR</i> |
| PGLR-E2  | 5' - GGGTTTAAUGAGTGTGATGCCATTTTGTGATTTG         |         |                               |
| RF-1     | 5' - AAATTTTGTGCTCACCGCCTGGAC                   |         | S/V                           |
| RF-2     | 5' - TCTCCTTGCATGCACCATTTCCTTG                  |         | S/V                           |
| RF-3     | 5' - TTGCGTCAGTCCAACATTTGTTGCCA                 |         | S/V                           |
| Hyg588 U | 5' - AGCTGCGCCGATGGTTTCTACAA                    | 588 bp  | Screening                     |
| Hyg588 L | 5' - GCGCGTCTGCTGCTCCATACAA                     |         |                               |

**Table S3** Primers used for RT-PCR

| Gene             | Sequence                            | gDNA | cDNA | Application           |
|------------------|-------------------------------------|------|------|-----------------------|
| FG09177 upper    | 5' - CGGAAAACATCATCCCAGAACTCGTGGC   | 534  | 534  | RT-PCR                |
| FG09177 lower    | 5' - TGCCATATCGTTTACATGCTTCCCAGA    | bp   | bp   |                       |
| FG09178 upper    | 5' - ATAAGTAACGACGGCAACGGAGACGGC    | 545  | 545  | RT-PCR                |
| FG09178 lower    | 5' - TCATCAATCAAAAAGCTCGCGGAATCG    | bp   | bp   |                       |
| FG09179 upper    | 5' - AGAAGGTCCTAACCCCGTGTGGCGT      | 502  | 367  | RT-PCR                |
| FG09179 lower    | 5' - CGTCTGCCCCAGCAAATTCACCAA       | bp   | bp   |                       |
| FG09180 upper    | 5' - TTCTTCAGCTTGGAAAACGTGCCCCG     | 473  | 473  | RT-PCR                |
| FG09180 lower    | 5' - CGTTTCTTTGCGCCAAGTTGTTTCCA     | bp   | bp   |                       |
| FG09181 upper    | 5' - ATCTGCGTTGTACCCTGACATTCCGCG    | 496  | 496  | RT-PCR                |
| FG09181 lower    | 5' - CGTATCCTCTTCCACGTATGCCACCGA    | bp   | bp   |                       |
| Fgd371-210 upper | 5' - ACGGGACTAACAGTCGAGCATCAGGGC    | 496  | 496  | RT-PCR                |
| Fgd371-210 lower | 5' - TCCTGGTCAACAAGCGCATCTCCGT      | bp   | bp   |                       |
| PGL1-T1 (CDS)    | 5' - GTTTGACCAGCTGCGAGACCCCATTTG    | 541  | 541  | RT-PCR and validation |
| PGL1-T2 (CDS)    | 5' - TCGTCCACAAGTATGCCGCTGGCTT      | bp   | bp   |                       |
| FG09183 upper    | 5' - TTCGTGATTGAAGACCTCCAGAGCCC     | 493  | 493  | RT-PCR                |
| FG09183 lower    | 5' - TGAACGCATGCCACGACAACATCATCTA   | bp   | bp   |                       |
| FG09184 upper    | 5' - GCCCAATCTCCATCTTGC AAATCCTCC   | 528  | 528  | RT-PCR                |
| FG09184 lower    | 5' - GCAGCTCAAGTTT CAGAGATCCCCACGA  | bp   | bp   |                       |
| FG09785 upper    | 5' - TTCAACTCAGCAGCTTTGGCCTTCTGG    | 602  | 479  | RT-PCR                |
| FG09785 lower    | 5' - TGGAGCGATCTCTGGATGATTCCGC      | bp   | bp   |                       |
| FG09186 upper    | 5' - CCCCTGCTGAATACCTTCCAATCCACC    | 593  | 491  | RT-PCR                |
| FG09186 lower    | 5' - CACTCACAGCACTAACTGCGGCATGTG    | bp   | bp   |                       |
| FG09187 upper    | 5' - CATAAGCCTCAGCCACATCCTCCACCT    | 491  | 491  | RT-PCR                |
| FG09187 lower    | 5' - CGAGACCCTCAACTCGGAAGTCGAAAA    | bp   | bp   |                       |
| PGLR-T1 (CDS)    | 5' - TGATCGGTCTCAACACAACGCCTTCTG    | 561  | 561  | RT-PCR                |
| PGLR-T2 (CDS)    | 5' - TGGCTTGGGATTACAGAGCATCGGAAT    | bp   | bp   |                       |
| FG09189 upper    | 5' - CTGGCGTAAGAGGGGATCCGAT         | 472  | 472  | RT-PCR                |
| FG09189 lower    | 5' - GCCGCCCCATTCAACAATAAGAA        | bp   | bp   |                       |
| FG09190 upper    | 5' - TCCTGACATTACCTCCGACTACTATACC   | 458  | 458  | RT-PCR                |
| FG09190 lower    | 5' - CCTCCATAGCTTGCTCTACCGA         | bp   | bp   |                       |
| FG09191 upper    | 5' - GACTCCATCTGACTCTTTCATCTGAT     | 517  | 517  | RT-PCR                |
| FG09191 lower    | 5' - GGATGGAGAAGCATAACAGAGAAGAAAT   | bp   | bp   |                       |
| FG09192 upper    | 5' - TTATCCTTGCTTTAATGAGCTGGATTTTCC | 608  | 479  | RT-PCR                |
| FG09192 lower    | 5' - CCTTCAAAGCTTCAACAGAAAAGACT     | bp   | bp   |                       |
| FG09193 upper    | 5' - AAGACTGATGATGCTAGTTCGGTTTC     | 500  | 500  | RT-PCR                |
| FG09193 lower    | 5' - AGTACCCCGCATTCAGTAGGAAG        | bp   | bp   |                       |
| FG09194 upper    | 5' - TTAGTCTAGCACCATAATACCAAGCCC    | 425  | 359  | RT-PCR                |
| FG09194 lower    | 5' - GCCAAAGTTATGCTTCTGGGGA         | bp   | bp   |                       |

## Genetic modification strategy

**Figure S1** Strategies for targeted replacement and overexpression of Gz-PGL1. The vectors were assembled in a single-step by In-Fusion PCR cloning. The validated plasmids were introduced in *Agrobacterium tumefaciens*, which mediated transformation of the T-DNA regions into *F. graminearum*. Targeted replacement of PGL1 (left in figure) was achieved by homologous recombination between the introduced T-DNA and the *PGL1* locus, resulting in replacement of the *PGL1* coding sequence with the hygromycin resistance gene (*hph*). Targeted over expression (right in figure) was achieved by homologous recombination between the introduced T-DNA and the *PGL1* locus, resulting in integration of the *gapdh* promoter in front of the *PGL1* coding sequence to obtain constitutive expression of the *PGL1* in vegetative tissue and production of the primary product of the PKS.

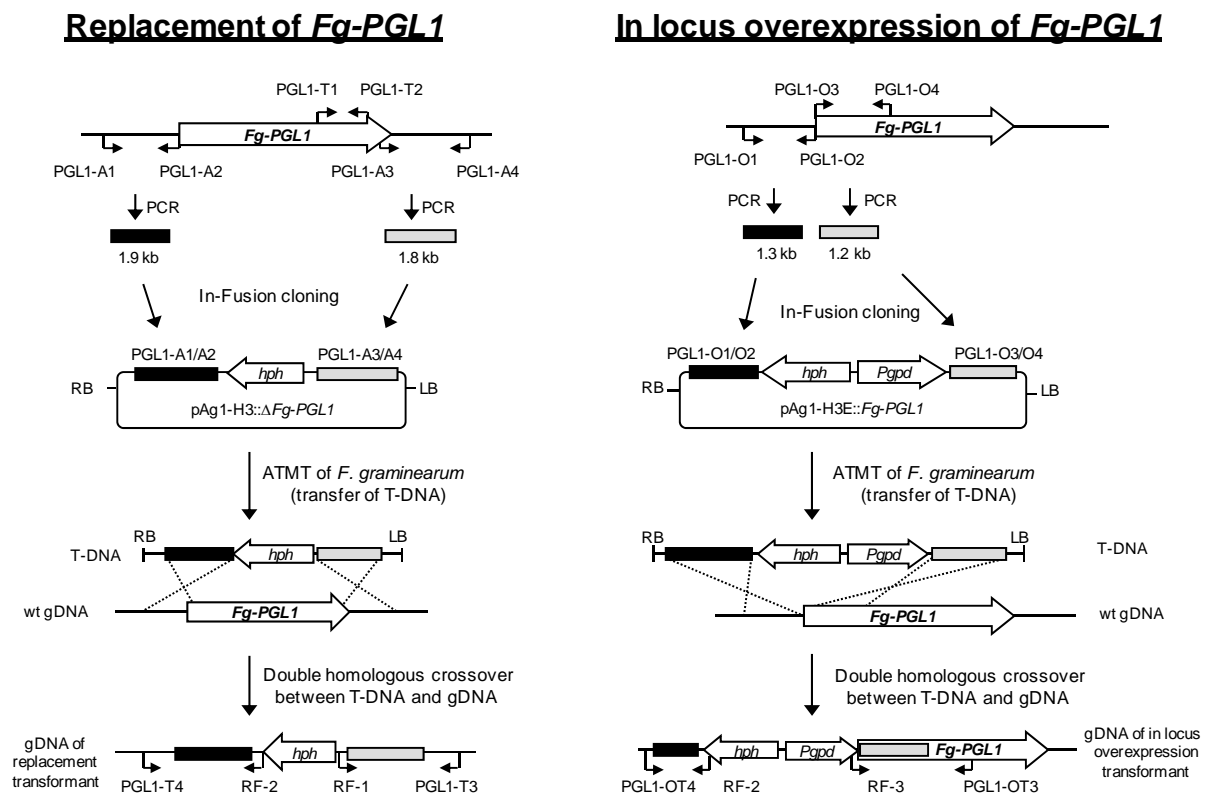

**Figure S2** Strategy for ectopic overexpression of *pglR*. The PGLR coding sequence plus terminator was amplified by PCR, treated with USER enzyme mix and cloned into the expression vector pRF-HUE. The construct was introduced into the *F. graminearum* wild-type strain by *Agrobacterium tumefaciens* mediated transformation, where it was expected integrated randomly via the non-homologous end-joining pathway. However, only a single transformant was found to contain the full-length expression cassette integrated into the endogenous *pglR* locus. Targeted integration of the overexpression cassette into the *PKS12* locus resulted in the recovery of several transformants carrying the full-length construct.

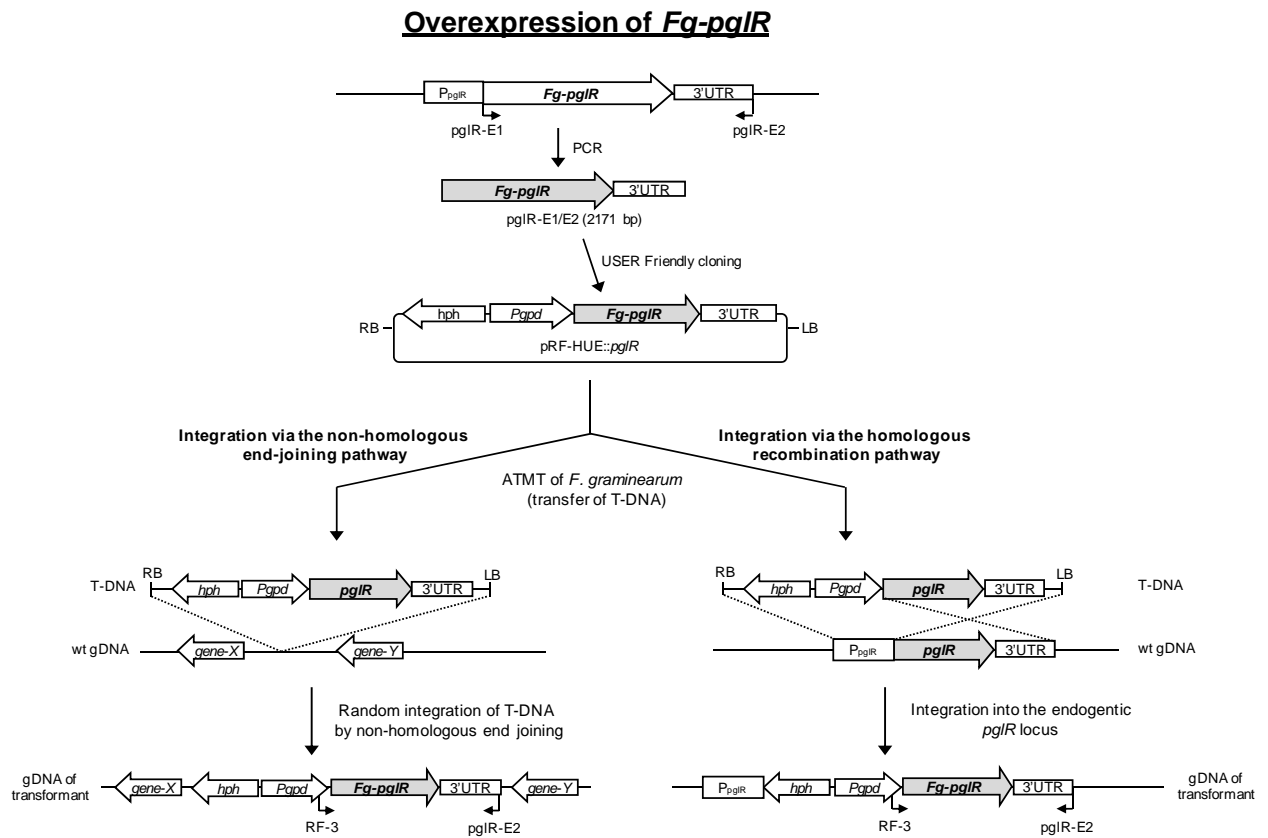

## Validation of genetically modified strains by PCR and Southern blot analysis

Validation of the introduced genetic modifications was performed via diagnostic PCR followed by a Southern analysis.

### The screening and validation process:

#### PCR validation:

The PCR screening and validation process consists of four different primer pairs for the gene deletion strains, three different primer pairs for the PGL1 *in locus* overexpression strain, and two primer pairs for the ectopic overexpression of PGLR (PGL6). The aim of the PCR-based validation was to show that homologous recombination had occurred between both ends of the T-DNA and target locus in deletion and *in locus* overexpression strains. The used primers are described in Table S3 while the expected amplicon sizes for the GMO strain and the wild type are shown below.

#### Southern blot strategy:

Genetically modified strains that showed the expected results in the PCR screening were subjected to a Southern blot analysis to determine the T-DNA copy number. The “Vector NTI” software package was used to design Southern blot strategy for the individual GMO strains. A 588 bp long PCR amplified fragment of the hygromycin resistance gene was used as probe. The two included figures shows the location of genes (above the line), primers (below the line) and restriction sites (above the line).

#### Southern blot analysis:

The aim of the Southern blot analysis was primarily to determine the T-DNA copy number and secondly to provide evidence for correct integration of the T-DNA. A probe targeting only the selection marker gene (hygR) was used. This strategy only results in bands in the genetically modified strains and not the wild type, as the wild type does not contain the selection marker gene. The sizes of the obtained bands have been calculated based on their individual traveling length compared to that of the bands found in the utilized 2Log ladder, which is not shown on the blots.

## *ΔPGL1* strain

### PCR validation

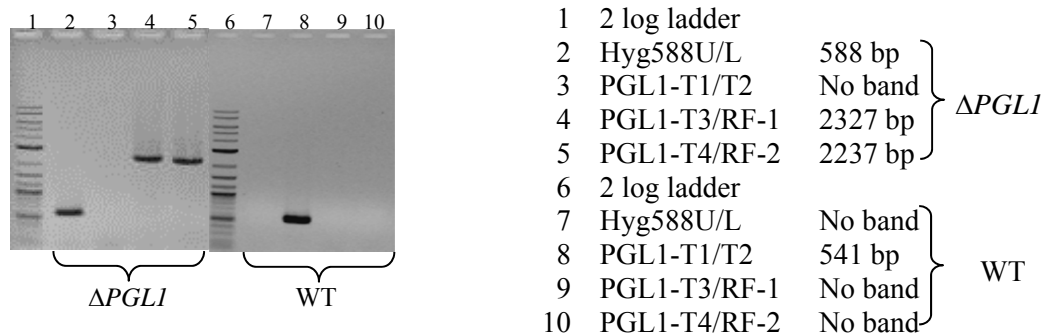

### Southern blot strategy:

Theoretical digestion of gDNA from the wild type and mutant strain with *SnaBI*

#### Wild type:

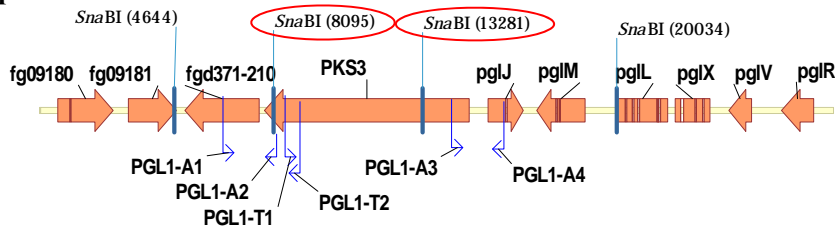

#### Mutant:

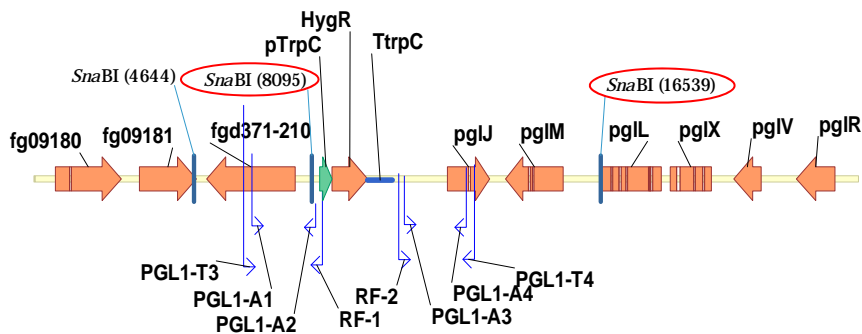

Expected band pattern

| Enzym        | WT      | <i>ΔPGL1</i> |
|--------------|---------|--------------|
| <i>SnaBI</i> | 5186 bp | 11895 bp     |

### Southern blot analysis with *SnaBI* digested gDNA

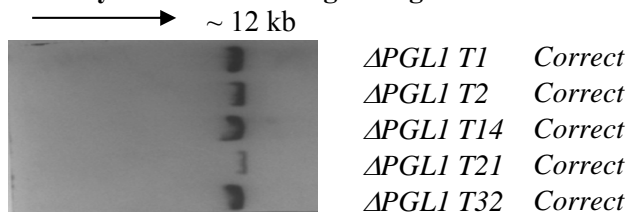

### Conclusion for the *ΔPGL1* strain

The isolated transformants displayed the expected band pattern in the PCR analysis. Southern blot analysis confirmed that the T-DNA had integrated by double homologous recombination, based on the hybridization band of ~12 kb. The Southern blot in addition showed that only a single copy had integrated.



## PGL1 strain

### PCR validation

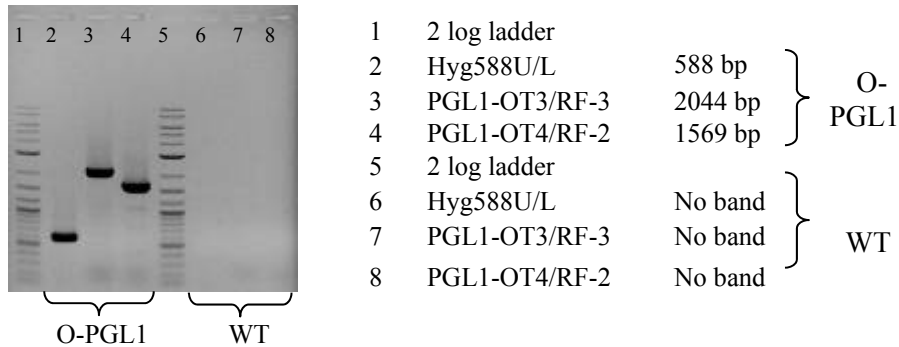

### Southern blot strategy:

Theoretical digestion of gDNA from the wild type and mutant strain with *SnaBI*

#### Wild type:

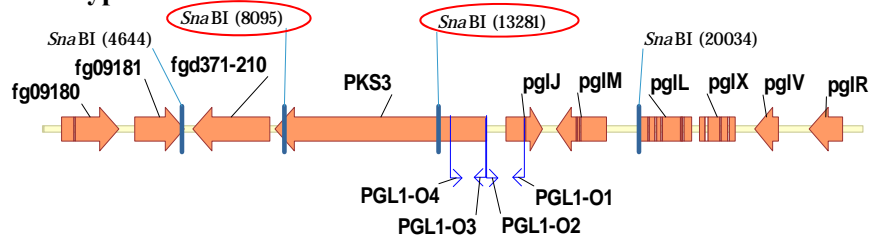

#### Mutant:

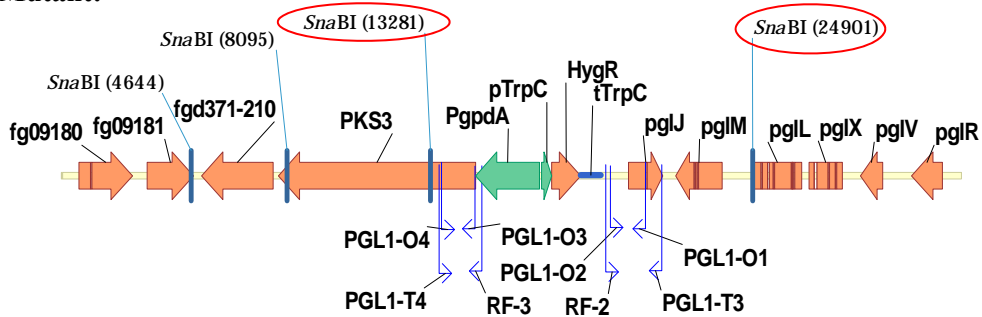

Expected band pattern

| Enzym        | WT      | $\Delta$ PGL1 |
|--------------|---------|---------------|
| <i>SnaBI</i> | 6753 bp | 11620 bp      |

### Southern blot analysis with *SnaBI* digested gDNA

→ ~ 12 kb

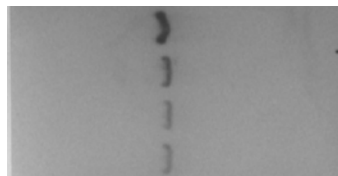

O-PGL1 #OT1 Correct  
 O-PGL1 #OT2 Correct  
 O-PGL1 #OT17 Correct  
 O-PGL1 #OT43 Correct

### Conclusion for the O-PGL1 strain

The isolated transformants displayed the expected band pattern in the PCR analysis. Southern blot analysis confirmed that the T-DNA had integrated by double homologous recombination, based on the hybridization band of ~12 kb. The Southern blot in addition showed that only a single copy had integrated.

## *ΔPGLJ* strain

### PCR validation

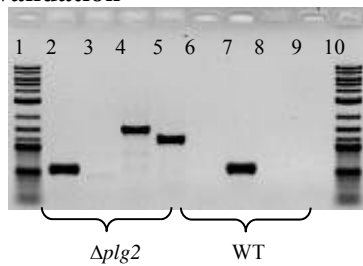

|    |              |         |
|----|--------------|---------|
| 1  | 2 log ladder |         |
| 2  | Hyg588U/L    | 588 bp  |
| 3  | PGLJ-T1/T2   | No band |
| 4  | PGLJ-T3/RF-1 | 1474 bp |
| 5  | RF-2/PGLJ-T4 | 1281 bp |
| 6  | Hyg588U/L    | No band |
| 7  | PGLJ-T1/T2   | 520 bp  |
| 8  | PGLJ-T3/RF-1 | No band |
| 9  | RF-2/PGLJ-T4 | No band |
| 10 | 2 log ladder |         |

### Southern blot strategy:

Theoretical digestion of gDNA from the wild type and mutant strain with *SnaBI*

#### Wild type:

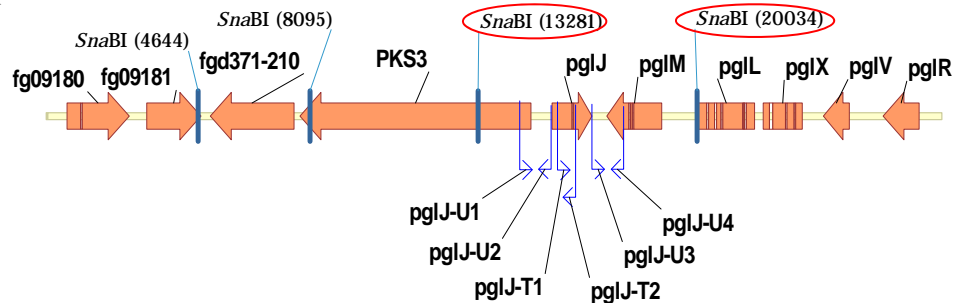

#### Mutant:

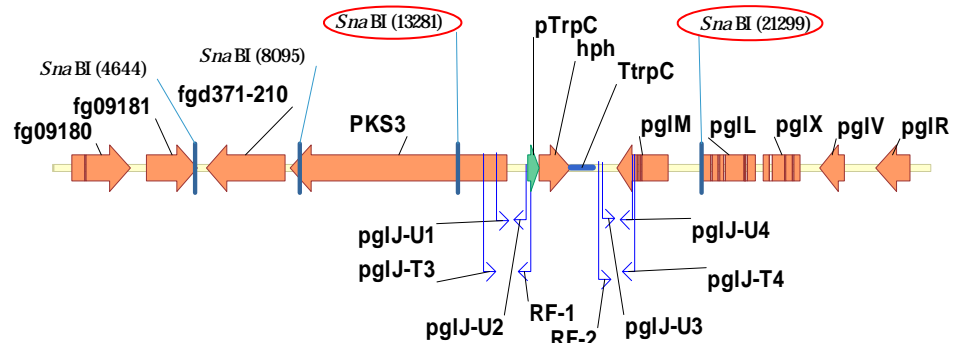

Expected band pattern

| Enzym        | WT      | <i>ΔPGLJ</i> |
|--------------|---------|--------------|
| <i>SnaBI</i> | 6753 bp | 8048 bp      |

### Southern blot analysis with *SnaBI* digested gDNA

→ ~ 8 kb

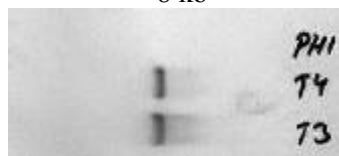

*G. zeae* PH-1 wild-type

*ΔPGLJ* T4

correct

*ΔPGLJ* T3

correct

### Conclusion for the *ΔPGLJ* strain

The isolated transformants displayed the expected band pattern in the PCR analysis. Southern blot analysis confirmed that the T-DNA had integrated by double homologous recombination, based on the hybridization band of 8 kb. The Southern blot in addition showed that only a single copy had integrated.

***ΔPGLM* strain  
PCR validation**

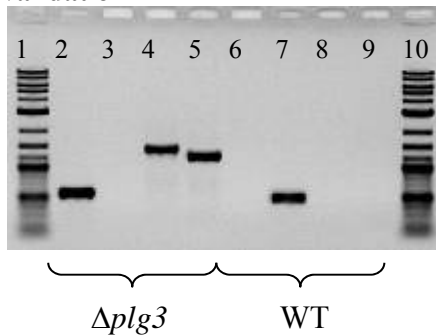

|    |              |         |                |
|----|--------------|---------|----------------|
| 1  | 2 log ladder |         |                |
| 2  | Hyg588U/L    | 588 bp  | } <i>ΔPGLM</i> |
| 3  | PGLM-T1/T2   | No band |                |
| 4  | PGLM-T3/RF-1 | 1474 bp |                |
| 5  | RF-2/PGLM-T4 | 1281 bp | } WT           |
| 6  | Hyg588U/L    | No band |                |
| 7  | PGLM-T1/T2   | 520 bp  |                |
| 8  | PGLM-T3/RF-1 | No band |                |
| 9  | RF-2/PGLM-T4 | No band |                |
| 10 | 2 log ladder |         |                |

**Southern blot strategy:**

Theoretical digestion of gDNA from the wild type and mutant strain with *SnaBI*

**Wild type:**

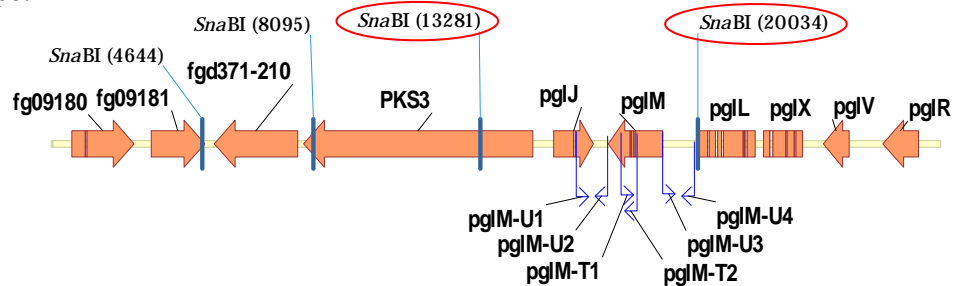

**Mutant:**

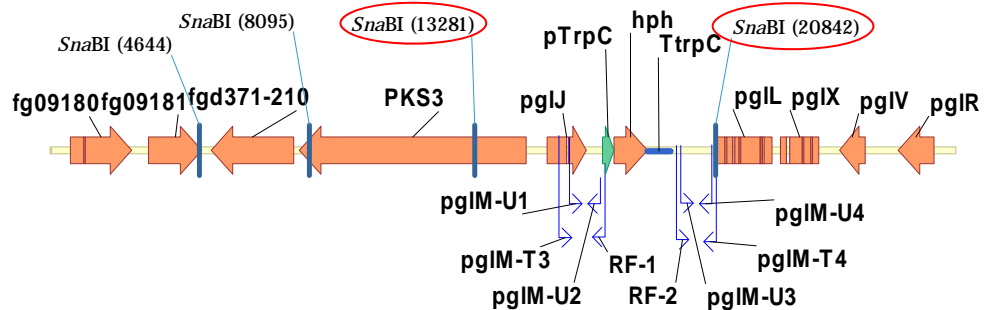

Expected band pattern

| Enzym        | WT      | <i>ΔPGLM</i> |
|--------------|---------|--------------|
| <i>SnaBI</i> | 6753 bp | 7561 bp      |

**Southern blot analysis with *SnaBI* digested gDNA**

→ ~ 7.5 kb

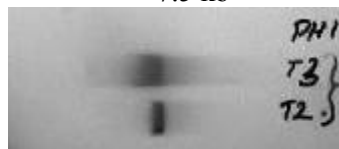

Gz PH-1 wild-type

*ΔPGLM* T3

*ΔPGLM* T2

double  
insert  
correct

**Conclusion for the *ΔPGLM* strain**

The isolated transformants displayed the expected band pattern in the PCR analysis. Southern blot analysis confirmed that the T-DNA had integrated by double homologous recombination, based on the hybridization band of 7.5 kb. The Southern blot in addition showed that only a single copy had integrated.

### *ΔpglX* strain

#### PCR validation

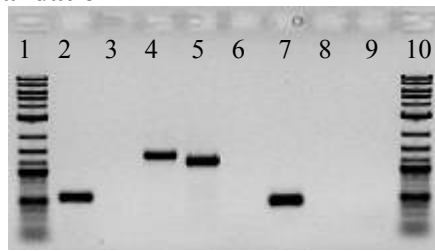

|    |                      |         |                 |
|----|----------------------|---------|-----------------|
| 1  | 2 log ladder         |         | } $\Delta PGLX$ |
| 2  | Hyg588U/L            | 588 bp  |                 |
| 3  | <i>pglX</i> -T1/T2   | No band |                 |
| 4  | <i>pglX</i> -T3/RF-1 | 1300 bp | } WT            |
| 5  | RF-2/PGLX-T4         | 1056 bp |                 |
| 6  | Hyg588U/L            | No band |                 |
| 7  | <i>PglX</i> -T1/T2   | 553 bp  |                 |
| 8  | <i>pglX</i> -T3/RF-1 | No band |                 |
| 9  | RF-2/PGLX-T4         | No band |                 |
| 10 | 2 log ladder         |         |                 |

#### Southern blot strategy:

Theoretical digestion of gDNA from the wild type and mutant strain with *HindIII*

#### Wild type:

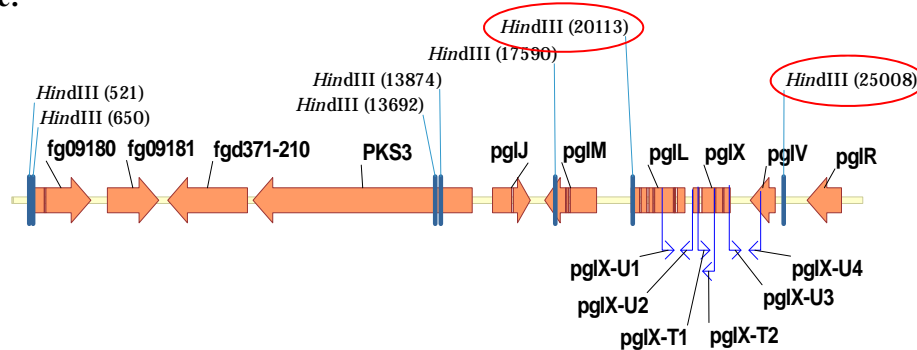

#### Mutant:

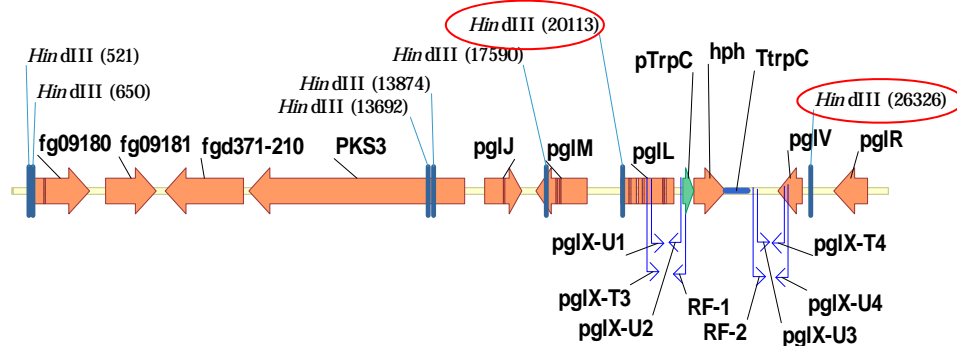

Expected band pattern

| Enzym          | WT      | $\Delta PGLX$ |
|----------------|---------|---------------|
| <i>HindIII</i> | 4895 bp | 6213 bp       |

#### Southern blot analysis with *HindIII* digested gDNA

→ ~ 6.2 kb

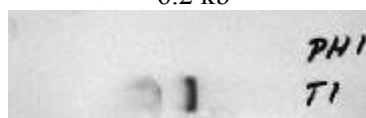

PH1 *G. zeae* PH-1 wild-type

$\Delta PGLX$  T1

correct

#### Conclusion for the $\Delta pglX$ strain

The isolated transformants displayed the expected band pattern in the PCR analysis. Southern blot analysis confirmed that the T-DNA had integrated by double homologous recombination, based on the hybridization band of 6.2 kb. The Southern blot in addition showed that only a single copy had integrated.

## *ΔPGLV* strain

### PCR validation

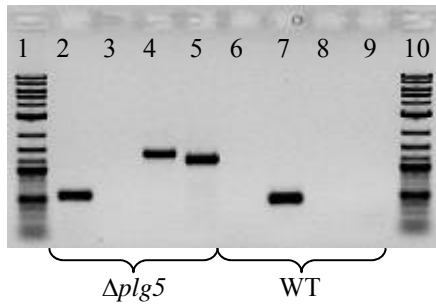

|    |              |         |                |
|----|--------------|---------|----------------|
| 1  | 2 log ladder |         |                |
| 2  | Hyg588U/L    | 588 bp  | } <i>ΔPGLV</i> |
| 3  | PGLV-T1/T2   | No band |                |
| 4  | PGLV-T3/RF-1 | 1416 bp |                |
| 5  | RF-2/PGLV-T4 | 1354 bp | } WT           |
| 6  | Hyg588U/L    | No band |                |
| 7  | PGLV-T1/T2   | 500 bp  |                |
| 8  | PGLV-T3/RF-1 | No band |                |
| 9  | RF-2/PGLV-T4 | No band |                |
| 10 | 2 log ladder |         |                |

### Southern blot strategy:

Theoretical digestion of gDNA from the wild type and mutant strain with *SalI*

#### Wild type:

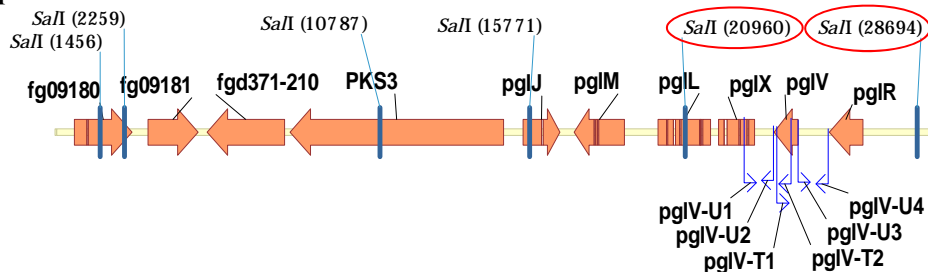

#### Mutant:

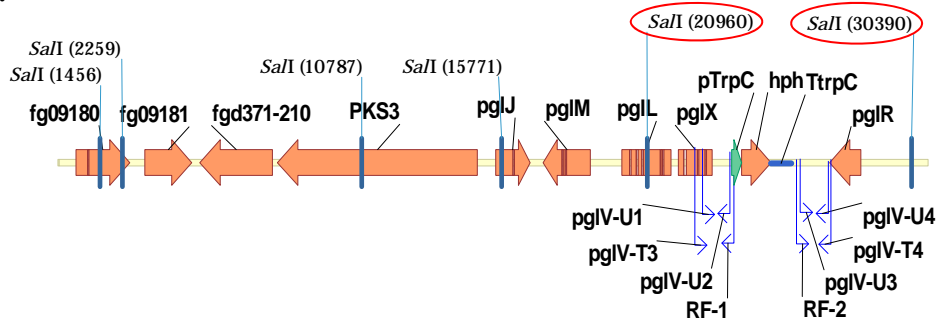

Expected band pattern

| Enzym       | WT      | <i>ΔPGLV</i> |
|-------------|---------|--------------|
| <i>SalI</i> | 7734 bp | 9530 bp      |

### Southern blot analysis with *SalI* digested gDNA

→ ~ 9.5 kb

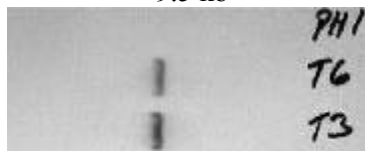

*G. zeae* PH-1 wild-type

*ΔPGLV* T6

correct

*ΔPGLV* T3

correct

### Conclusion for the *ΔPGLV* strain

The isolated transformants displayed the expected band pattern in the PCR analysis. Southern blot analysis confirmed that the T-DNA had integrated by double homologous recombination, based on the hybridization band of 9.5 kb. The Southern blot in addition showed that only a single copy had integrated.

## PGLR strain

### PCR validation

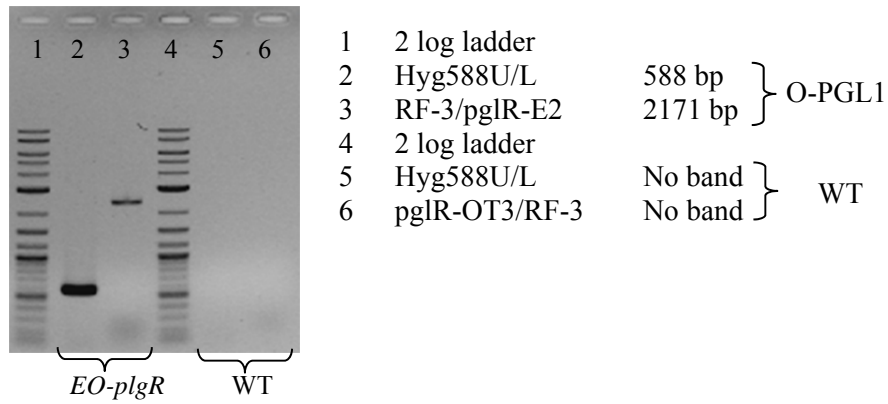

### Southern blot strategy:

The ectopic integration of the T-DNA makes it impossible to predict the fragment sizes obtained during the Southern blot analysis. We therefore chose to cut the genomic DNA with *Bst*XI, which does not cut internally in the T-DNA. Based on this one would expect two bands when probing with the coding sequence of PGLR fragment (one from the endogenous copy and one from the introduced copy)

### Southern blot analysis with *Sna*BI digested gDNA

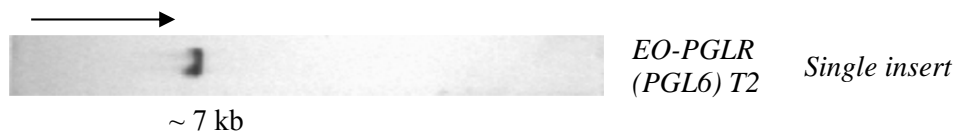

### Conclusion for the EO-PGLR (PGL6) strain

The isolated transformant displayed the expected band pattern in the PCR analysis. Southern blot analysis using part of the *pglR* CDS as a probe showed that the strain only contained a single copy of the gene. This suggests that the T-DNA copy has integrated by a single homologous recombination event with the endogenous locus.

## Evolutionary models for the development of pigment biosynthesis in *Fusarium*

The Figure S3 below shows the possible models for the evolution of pigment biosynthesis in the *Fusarium* genus. Loss of a gene cluster is indicated by ‘-’ in red, while gains (horizontal gene transfers) are indicated by ‘+’ in green. The expression pattern of the individual cluster is indicated by ‘m’ for mycelium and ‘p’ for perithecial. ‘\*’ represent shifts in the expression pattern of the *PGL1* gene cluster following introduction of a redundant gene cluster.

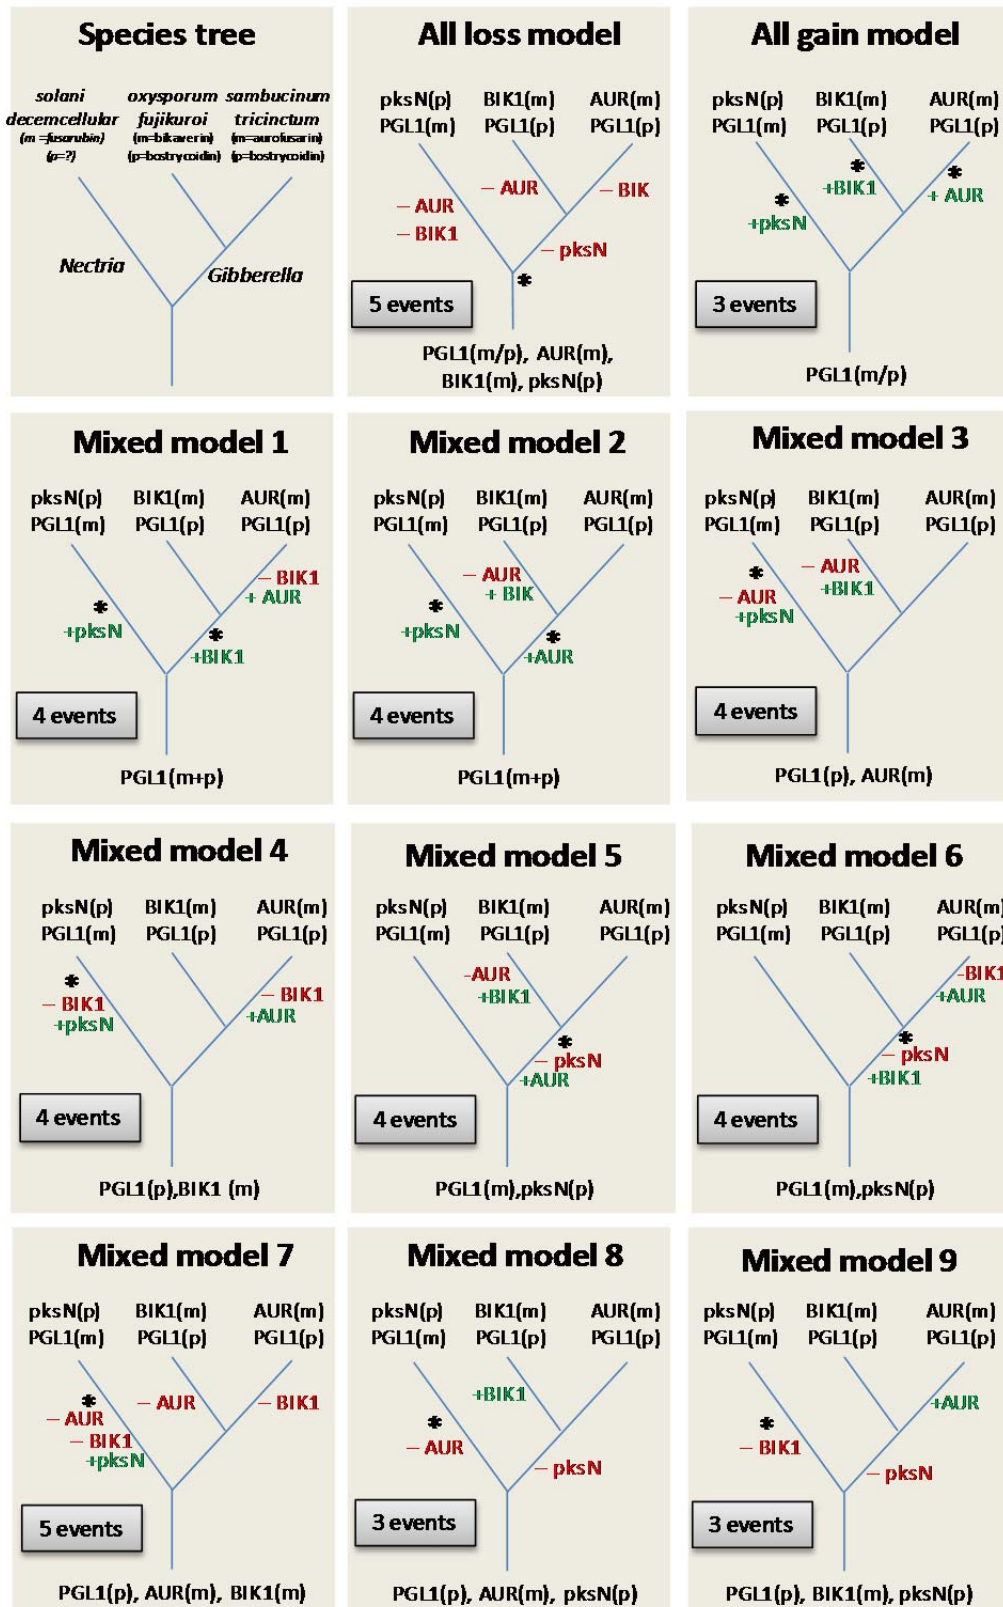

## UV/VIS and MS data for compound (1) to (5)

|     | UV                                                                                  | $m/z$ of $[M+H]^+$ | Elemental composition |
|-----|-------------------------------------------------------------------------------------|--------------------|-----------------------|
| (1) | 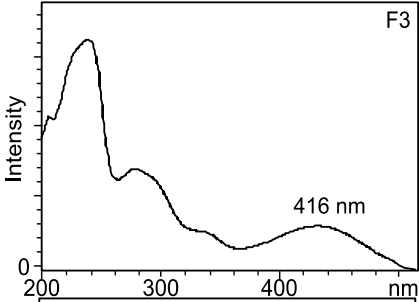   | 256.0604           | $C_{14}H_9NO_4$       |
| (2) |   | 270.0761           | $C_{15}H_{11}NO_4$    |
| (3) |  | 256.0965           | $C_{15}H_{13}NO_3$    |
| (4) |  | 242.0812           | $C_{14}H_{11}NO_3$    |
| (5) |  | 477.1083           | $C_{28}H_{16}N_2O_6$  |



## NMR data for compound (3) and (5)

**Table S4**  $^1\text{H}$ - $^{13}\text{C}$  correlations ( $\delta$  in  $\text{DMSO-}d_6$ ) observed in the HMBC spectra of 5-deoxybostrycoidin anthrone (3).

| #No  | $\delta^1\text{H}$<br>(Multiplicity) | $\delta^{13}\text{C}$ | HMBC                |
|------|--------------------------------------|-----------------------|---------------------|
| 15   | 2.64 (s)                             | 24.1                  | 3, 4                |
| 16   | 3.87 (s)                             | 54.9                  | 6                   |
| 10   | 4.24 (s)                             | 31.5                  | 1, 4, 5, 11, 12, 14 |
| 7    | 6.44 (s, $J=1.8$ )                   | 98.9                  | 5, 8                |
| 5    | 6.46 (s, $J=1.8$ )                   | 105.8                 | 12                  |
| 4    | 7.17 (s)                             | 121.6                 | 3, 10, 14, 15       |
| 1    | 9.35 (s)                             | 148.5                 | 3, 14               |
| OH-8 | 13.17 (s)                            | -                     | 12                  |
| 12   | -                                    | 110.9                 |                     |
| 3    | -                                    | 162.1                 |                     |
| 14   | -                                    | 124.2                 |                     |
| 11   | -                                    | 141.7                 |                     |
| 13   | -                                    | 148.5                 |                     |
| 6    | -                                    | 165.6                 |                     |
| 8    | -                                    | 165.9                 |                     |
| 9    | -                                    | n.o.                  |                     |

**Table S5.**  $^1\text{H}$  and  $^{13}\text{C}$  NMR and assignments and  $^1\text{H}$ - $^{13}\text{C}$  correlations ( $\delta$  in  $\text{DMSO-}d_6$ ) observed in the HMBC spectra for purpurfusarin (**5**).  $^1\text{H}$  and  $^{13}\text{C}$  NMR shifts relative to  $(\text{CHD}_2)_2\text{SO} = 2.49$  ppm and  $(\text{CD}_3)_2\text{SO} = 39.5$  ppm, respectively. (w) refers to a weak correlation observed in a 3 Hz optimized HMBC experiment.

| #No         | $\delta^1\text{H}$<br>(Multiplicity) | $\delta^{13}\text{C}$ | Integral | HMBC              |
|-------------|--------------------------------------|-----------------------|----------|-------------------|
| 15, 15'     | 2.37 (s)                             | 23.5                  | 6        | 3, 4              |
| 7, 7'       | 6.39 (s)                             | 104.2                 | 2        | 5, 6, 8,<br>12    |
| 4, 4'       | 7.72 (s)                             | 123.6                 | 2        | 13, 14,<br>15     |
| 1, 1'       | 9.43 (s)                             | 147.3                 | 2        | 3, 9, 14,<br>13,  |
| OH-8, OH-8' | 15.86 (s)                            | -                     | 2        | 6, 7, 8,<br>9, 12 |
| OH-6, OH-6' | 18.43 (s)                            | -                     | 1        | 6, 7              |
| 12, 12'     | -                                    | 100.3                 |          |                   |
| 5, 5'       | -                                    | 120.6                 |          |                   |
| 14, 14'     | -                                    | 122.1                 |          |                   |
| 10, 10'     | -                                    | 125.5                 |          |                   |
| 11, 11'     | -                                    | 130.0                 |          |                   |
| 13, 13'     | -                                    | 140.1                 |          |                   |
| 3, 3'       | -                                    | 157.8                 |          |                   |
| 8, 8'       | -                                    | 169.1                 |          |                   |
| 6, 6'       | -                                    | 173.4                 |          |                   |
| 9, 9'       | -                                    | 180.6                 |          |                   |

## Possible configuration of pupurfusarin (5)

The oxidative coupling of two anthrones could give rise to 2 different isomeric configurations, C1 and C2, as shown in the figure below. The NOESY spectrum shows a correlation between H-15 and H-1 and H-4 and it did not show any correlation between H-4 and H-7 that might have been expected if **5** had adopted the isomeric configuration C2. Hence, we expect (**5**) to adopt the C1 configuration.

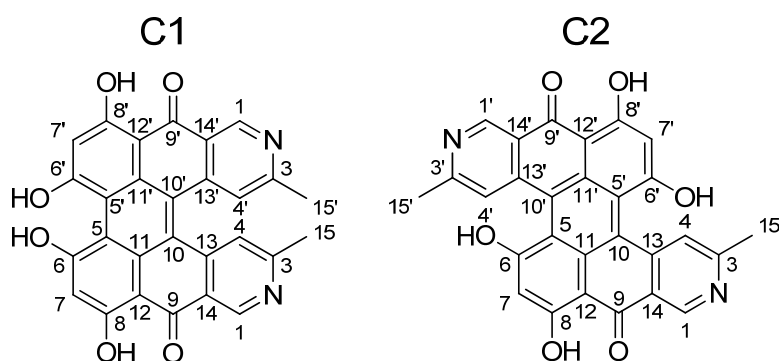

## Selected HMBC and NOE correlation for pupurfusarin (5)

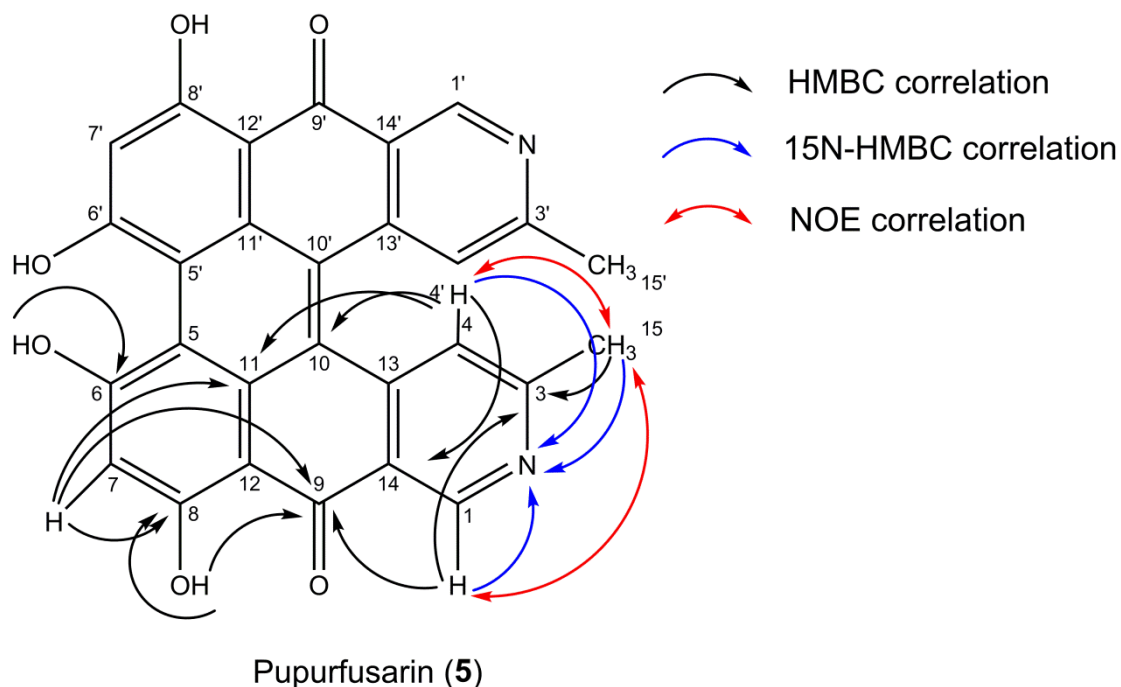

<sup>15</sup>N-HMBC spectrum of pupurfusarin in MeOH-d<sub>4</sub>. The four protons H-1/H-1' ( $\delta$ H = 9.43 ppm), H-4/H-4' ( $\delta$ H = 7.72 ppm) and the protons of the methyl group H-15/H-15' ( $\delta$ H = 2.73 ppm) all showed long-range correlation to a <sup>15</sup>N resonating at 317.5 ppm

### 15N-HMBC of (5)

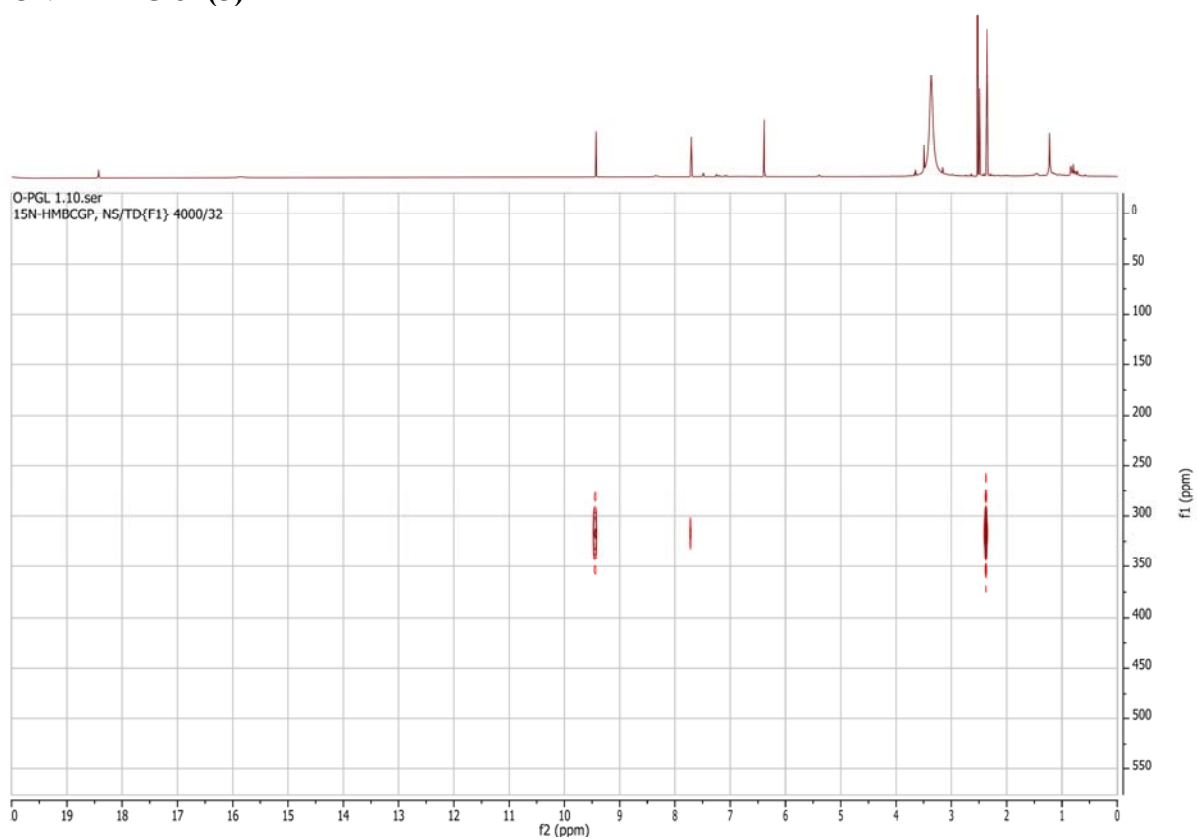

### 13CAPT of (5)

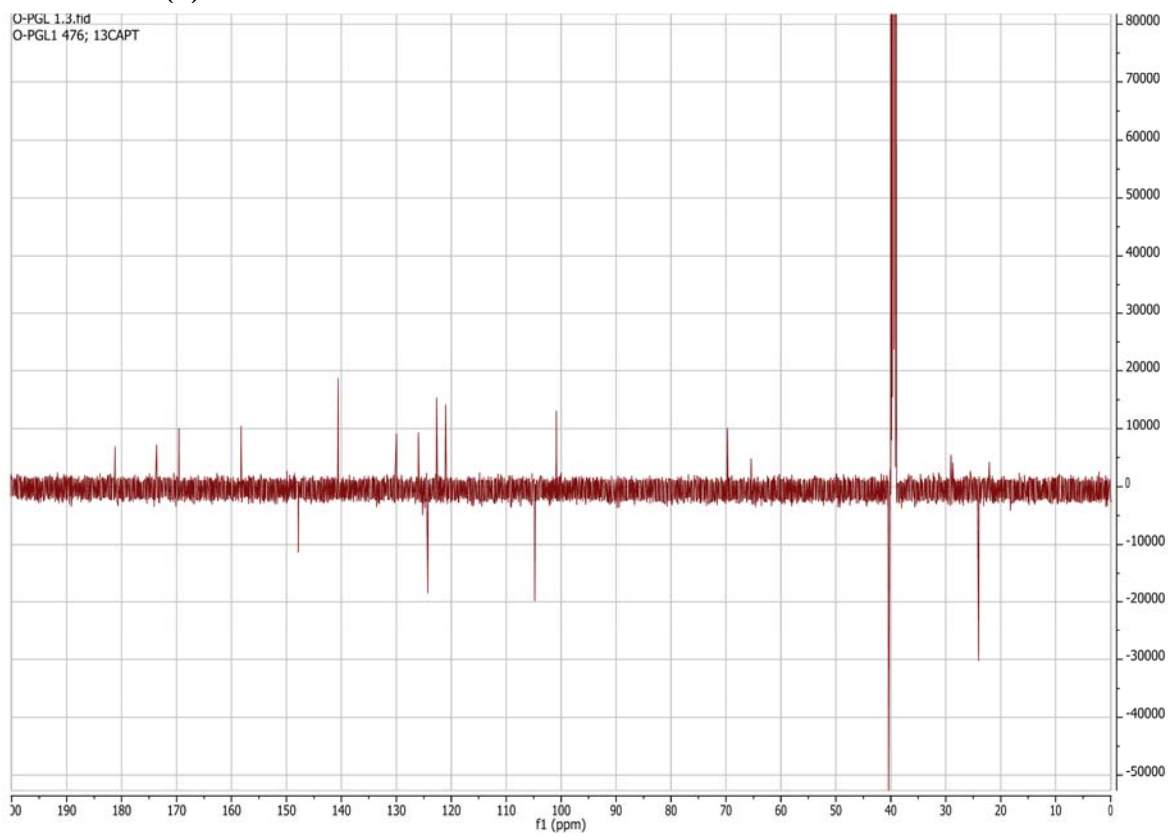

## Purification scheme for compound (3), (4) and (5)

**Table S6** purification of (3)

| Compound                         | Fractionation                     | Semi-Prep                                                                                                                                                                                                                                                                                                        |
|----------------------------------|-----------------------------------|------------------------------------------------------------------------------------------------------------------------------------------------------------------------------------------------------------------------------------------------------------------------------------------------------------------|
| (3) 5-deoxybostrycoidin anthrone | No fractionation of crude extract | (3) was almost pure after the Liquid-Liquid extraction with DCM. The final purification of (3) was first attempted on LUNA C18 using a water-MeCN gradient with no success.<br>(3) was successfully purified using LUNA PFP using a water-MeOH gradient from 60-100 % containing 20 mM FA. The yield was 3.8 mg. |

**Table S7** purification of (2)

| Compound                                      | Fractionation                                                                                                                                                                                                                                                                                                                                                                             | Semi-Prep                                                                                                                                                                                                                                          |
|-----------------------------------------------|-------------------------------------------------------------------------------------------------------------------------------------------------------------------------------------------------------------------------------------------------------------------------------------------------------------------------------------------------------------------------------------------|----------------------------------------------------------------------------------------------------------------------------------------------------------------------------------------------------------------------------------------------------|
| (4) 6-O-Demethyl-5-deoxybostrycoidin anthrone | 10 g Isolute DIOL (Biotage, Uppsala, Sweden).<br>Eluted with the following solvent (30 ml):<br><ol style="list-style-type: none"> <li>1. DCM</li> <li>2. DCM:EtOAc (1:1)</li> <li>3. DCM:EtOAc (2:8)</li> <li>4. EtOAc</li> <li>5. EtOAc:MeOH (95:5)</li> <li>6. EtOAc:MeOH (8:2)</li> <li>7. EtOAc:MeOH (1:1)</li> <li>8. EtOAc:MeOH (1:1)</li> <li>9. MeOH</li> <li>10. MeOH</li> </ol> | The pooled fraction of the EtOAc:MeOH(95:5) and EtOAc:MeOH (8:2) 33.8 mg was further purified on LUNA PFP (250x10 mm, 5µm, Phenomenex, Torrance, CA, U.S.) using a 60-100 MeOH % + 20 mM FA gradient over 20 min. The yield of (4) was below 1 mg. |

**Table S8** purification of (5)

| Compound         | Fractionation                                                                                                                                                                                                                                                                                                                                               | Semi-Prep                                                                                                                                                                                                                                                                                                                               |
|------------------|-------------------------------------------------------------------------------------------------------------------------------------------------------------------------------------------------------------------------------------------------------------------------------------------------------------------------------------------------------------|-----------------------------------------------------------------------------------------------------------------------------------------------------------------------------------------------------------------------------------------------------------------------------------------------------------------------------------------|
| Pupurfusarin (5) | 10 g Isolute DIOL (Biotage, Uppsala, Sweden).<br>Eluted with the following solvent (15 ml):<br><ol style="list-style-type: none"> <li>1. Heptane:DCM (1:1),</li> <li>2. DCM:EtOAc (8:2),</li> <li>3. DCM:EtOAc (4:6),</li> <li>4. DCM:EtOAc (2:8),</li> <li>5. EtOAc</li> <li>6. EtOAc</li> <li>7. EtOAc:ACN (8:2),</li> <li>8. EtOAc:ACN (1:1),</li> </ol> | LH-20 (40x4 cm) equilibrated in MeOH. The last five MeOH fractions from the second Diol fractionation was pooled and dried. The extract was dissolved in 400 ul MeOH and loaded on the column. The column was eluted with MeOH with a linear flow rate of 3.2 cm/hour. The Purple band was visually followed and eluted after 16 hours. |

|  |                                                                                                                                                                                                                                                                                                                                                                                                                                                                                                                                                       |  |
|--|-------------------------------------------------------------------------------------------------------------------------------------------------------------------------------------------------------------------------------------------------------------------------------------------------------------------------------------------------------------------------------------------------------------------------------------------------------------------------------------------------------------------------------------------------------|--|
|  | <ol style="list-style-type: none"><li>9. EtOAc:ACN</li><li>10. EtOAc</li><li>11. EtOAc:ACN(8:2)</li><li>12. EtOAc:ACN (1:1)</li><li>13. EtOAc:ACN (1:1)</li><li>14. ACN</li><li>15. ACN</li><li>16. ACN</li><li><b>17. 5x MeOH,</b></li></ol> <p>The last five MeOH fractions was then dried and re-run on a 10 g Isolute DIOL (Biotage, Uppsala, Sweden) with the following solvents:</p> <ol style="list-style-type: none"><li>1. EtOAc</li><li><b>2. EtOAc:ACN(8:2)</b></li><li><b>3. EtOAc:ACN (1:1)</b></li><li>4. ACN</li><li>5. MeOH</li></ol> |  |
|--|-------------------------------------------------------------------------------------------------------------------------------------------------------------------------------------------------------------------------------------------------------------------------------------------------------------------------------------------------------------------------------------------------------------------------------------------------------------------------------------------------------------------------------------------------------|--|
